# Supplementary material for: Local and transboundary contributions to nitrogen loadings across East Asia using CMAQ-ISAM and GEMS-informed emissions inventory during the winter-spring transition
Source: Copernicus journal article supplement (doi:10.5194/egusphere-2024-3312), 2024-10-24
Supplement: Supplementary file 1 [file egusphere-2024-3312-supplement.pdf]

## *Supplement of*

# **Local and transboundary contributions to nitrogen loadings across East Asia using CMAQ-ISAM and GEMS-informed emissions inventory during the winter-spring transition**

5 Jincheol Park, Yunsoo Choi, Sagun Gopal Kayastha

Department of Earth and Atmospheric Sciences, University of Houston, Houston, TX, USA

*Correspondence to:* Yunsoo Choi (ychoi6@uh.edu)

**Table S1:** Modeling setup.

| Weather Research and Forecasting (WRF) 3.8.1 |                                                                                                          |
|----------------------------------------------|----------------------------------------------------------------------------------------------------------|
| Microphysics                                 | Morrison two-moment scheme (Morrison et al., 2009)                                                       |
| Longwave and shortwave radiation             | Rapid Radiative Transfer Model for GCMs (RRTMG) (Clough et al., 2005; Iacono et al., 2008)               |
| Land surface model                           | Pleim-Xiu land surface model (Xiu and Pleim, 2001)                                                       |
| Surface layer                                | Pleim-Xiu surface layer (Pleim, 2006)                                                                    |
| Planetary boundary layer                     | ACM2 planetary boundary layer model (Pleim, 2007a; Pleim, 2007b)                                         |
| Cumulus parameterization                     | Kain-Fritsch (new Eta) scheme (Kain, 2004)                                                               |
| Four-dimensional data assimilation           | FDDE option for grid-nudging (Jeon et al., 2015)                                                         |
| Initial and boundary conditions              | National Centers for Environmental Prediction FNL (final) operational model global tropospheric analysis |
| CMAQ DDM-3D 5.2 and CMAQ-ISAM 5.3.2          |                                                                                                          |
| Horizontal advection                         | YAMO                                                                                                     |
| Vertical advection                           | WRF omega formula                                                                                        |
| Horizontal diffusion                         | Multiscale                                                                                               |
| Vertical diffusion                           | ACM2 vertical diffusion scheme (Pleim, 2007a; Pleim, 2007b)                                              |
| Chemical mechanism                           | Carbon Bond 5 (cb05tucl) for CMAQ DDM-3D 5.2<br>Carbon Bond 6 (cb6r3) for CMAQ-ISAM 5.3.2                |
| Aerosol processing module                    | The 6th generation CMAQ aerosol module (AERO6)                                                           |
| Dry deposition model                         | M3Dry (Pleim, 2007b)                                                                                     |
| Boundary condition                           | Profile (static)                                                                                         |

**Table S2:** Percent changes (%) in inventoried extent of NO<sub>x</sub> emissions from the prior to posterior estimates across five regions of East Asia during the period from January to May 2022.

|                     | January | February | March | April | May   | Average |
|---------------------|---------|----------|-------|-------|-------|---------|
| Korea               | 182.89  | 41.44    | 13.13 | 16.90 | -3.79 | 50.12   |
| Northeast China     | 29.58   | 27.44    | 39.97 | 33.84 | 23.45 | 30.86   |
| North China         | 55.84   | 53.76    | 97.78 | 98.60 | 87.19 | 78.63   |
| East China          | 14.37   | 16.74    | 34.32 | 27.19 | 11.20 | 20.76   |
| South Central China | -7.56   | 1.07     | 4.74  | 13.78 | 0.98  | 2.60    |

**Table S3:** Descriptive statistics comparing observed and modeled hourly surface PM<sub>2.5</sub> concentrations averaged at ground-based measurement sites during the period from January to May 2022. Prior: modeled concentrations using the a priori NO<sub>x</sub> emissions, Posterior: modeled concentrations using the a posteriori NO<sub>x</sub> emissions. R: Pearson's correlation coefficient, IOA: Index of Agreement, NMB: normalized mean bias (%), MAE: mean absolute error (ppb).

|       |           |     | January | February | March  | April  | May    | 5-month |
|-------|-----------|-----|---------|----------|--------|--------|--------|---------|
| Korea | Prior     | R   | 0.91    | 0.92     | 0.87   | 0.76   | 0.77   | 0.82    |
|       |           | IOA | 0.79    | 0.92     | 0.90   | 0.84   | 0.85   | 0.86    |
|       |           | NMB | -43.23  | -21.55   | -15.87 | -15.02 | -10.47 | -21.01  |
|       |           | MAE | 11.54   | 5.66     | 4.98   | 4.78   | 4.20   | 5.83    |
|       | Posterior | R   | 0.90    | 0.91     | 0.86   | 0.78   | 0.77   | 0.82    |
|       |           | IOA | 0.80    | 0.94     | 0.91   | 0.86   | 0.85   | 0.88    |
|       |           | NMB | -38.21  | -14.34   | -9.84  | -12.37 | -10.72 | -16.95  |
|       |           | MAE | 10.20   | 5.17     | 4.68   | 4.58   | 4.18   | 5.44    |
| China | Prior     | R   | 0.53    | 0.73     | 0.57   | 0.51   | 0.44   | 0.61    |
|       |           | IOA | 0.50    | 0.66     | 0.62   | 0.61   | 0.65   | 0.60    |
|       |           | NMB | -49.29  | -28.30   | -34.16 | -32.97 | -7.93  | -32.50  |
|       |           | MAE | 29.52   | 11.62    | 15.05  | 13.65  | 5.93   | 14.07   |
|       | Posterior | R   | 0.54    | 0.75     | 0.59   | 0.51   | 0.45   | 0.64    |
|       |           | IOA | 0.51    | 0.68     | 0.63   | 0.61   | 0.65   | 0.62    |
|       |           | NMB | -46.88  | -27.79   | -31.81 | -31.76 | -7.85  | -31.05  |
|       |           | MAE | 28.10   | 11.34    | 14.40  | 13.31  | 5.83   | 13.58   |

## Modeled and observed meteorology in Korea

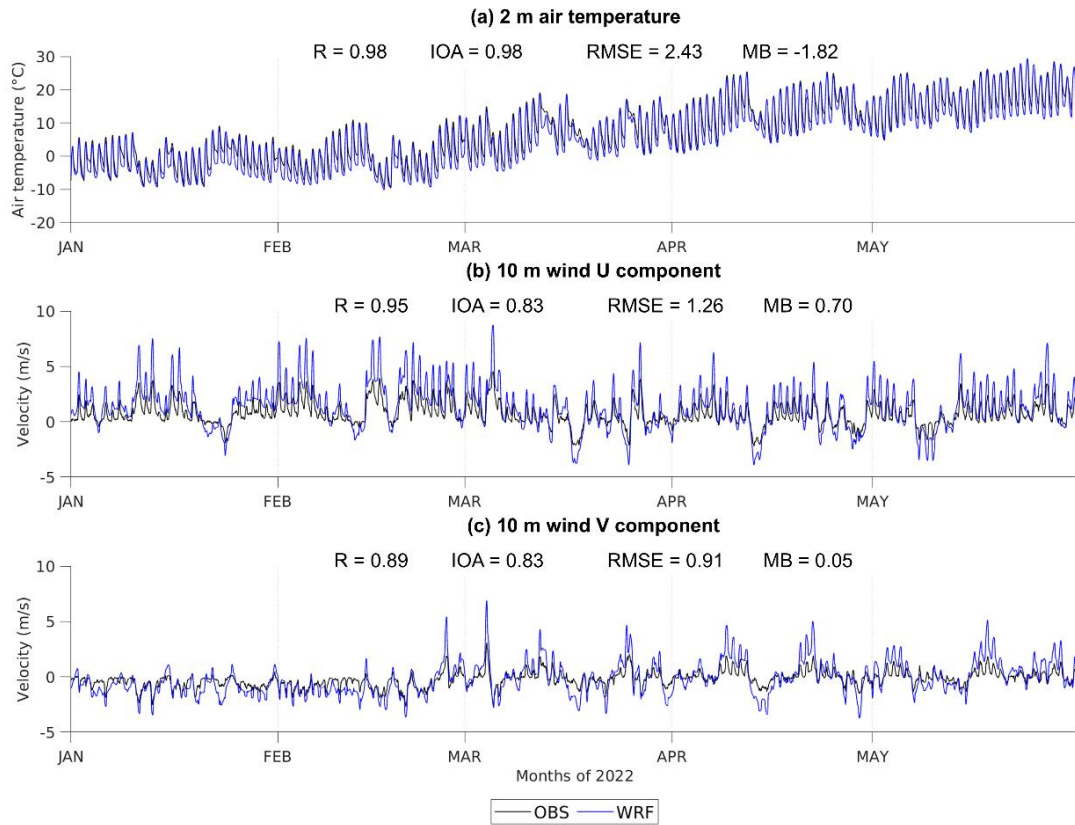

20

**Figure S1:** WRF-simulated hourly surface meteorological fields and those observed at 95 weather stations in Korea during the period from January 1 to May 31, 2022. (a) 2 m air temperature (°C), (b) 10 m wind U component (m/s), and (c) 10 m wind V component (m/s). The black and blue lines indicate the observed and WRF-simulated meteorology, respectively.

25

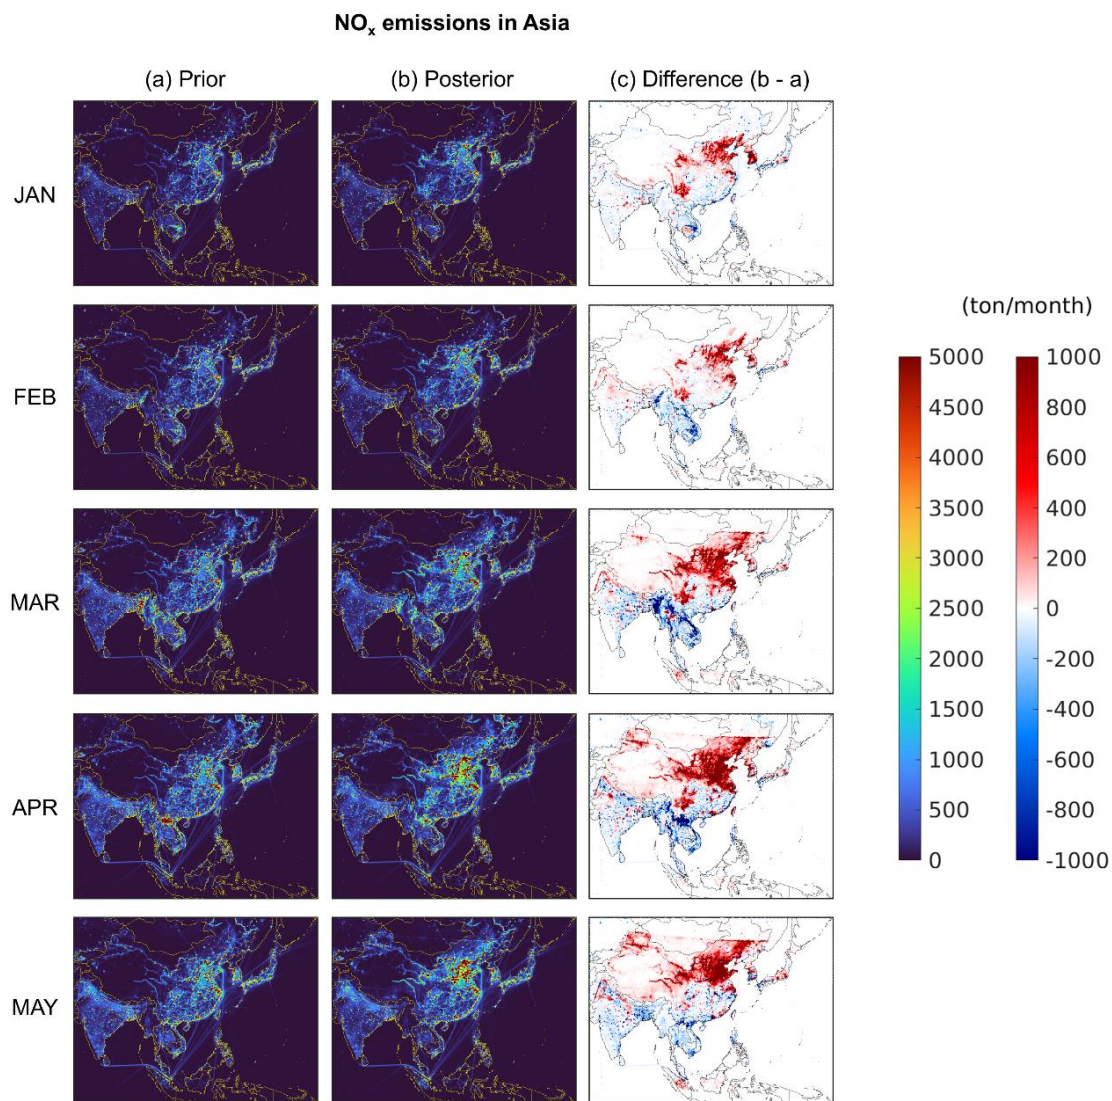

**Figure S2:** Monthly total (sum) NO<sub>x</sub> emissions (ton/month) during daylight hours (GEMS retrieval hours) from January to May 2022. (a) the a priori emissions, (b) the a posteriori emissions, (c) differences (b - a).

## References

- Clough, S. A., Shephard, M. W., Mlawer, E. J., Delamere, J. S., Iacono, M. J., Cady-Pereira, K., Boukabara, S., & Brown, P. D.: Atmospheric radiative transfer modeling: A summary of the AER codes, *J. Quant. Spectrosc. Ra.*, 91(2), 233–244, <https://doi.org/10.1016/j.jqsrt.2004.05.058>, 2005.
- Iacono, M. J., Delamere, J. S., Mlawer, E. J., Shephard, M. W., Clough, S. A., & Collins, W. D.: Radiative forcing by long-lived greenhouse gases: Calculations with the AER radiative transfer models, *J. Geophys. Res-atmos.*, 113(D13), <https://doi.org/10.1029/2008JD009944>, 2008.
- Jeon, W., Choi, Y., Lee, H. W., Lee, S.-H., Yoo, J.-W., Park, J., & Lee, H.-J.: A quantitative analysis of grid nudging effect on each process of PM<sub>2.5</sub> production in the Korean Peninsula, *Atmos. Environ.*, 122, 763–774, <https://doi.org/10.1016/j.atmosenv.2015.10.050>, 2015.
- Kain, J. S.: The Kain–Fritsch convective parameterization: An update, *J. Appl. Meteorol. Clim.*, 43(1), 170–181, [https://doi.org/10.1175/1520-0450\(2004\)043<0170:TKCPAU>2.0.CO;2](https://doi.org/10.1175/1520-0450(2004)043<0170:TKCPAU>2.0.CO;2), 2004.
- Morrison, H., Thompson, G., & Tatarskii, V.: Impact of cloud microphysics on the development of trailing stratiform precipitation in a simulated squall line: Comparison of one- and two-moment schemes, *Mon. Weather. Rev.*, 137(3), 991–1007, <https://doi.org/10.1175/2008MWR2556.1>, 2009.
- Pleim, J. E., Xiu, A., Finkelstein, P. L., & Otte, T. L.: A coupled land-surface and dry deposition model and comparison to field measurements of surface heat, moisture, and ozone fluxes, *Water. Air. Soil. Poll.*, 1(5), 243–252. <https://doi.org/10.1023/A:1013123725860>, 2001.
- Pleim, J. E.: A simple, efficient solution of flux–profile relationships in the atmospheric surface layer. *J. Appl. Meteorol. Clim.*, 45(2), 341–347, <https://doi.org/10.1175/JAM2339.1>, 2006.
- Pleim, J. E.: A combined local and nonlocal closure model for the atmospheric boundary layer Part I: Model description and testing, *J. Appl. Meteorol. Clim.*, 46(9), 1383–1395, <https://doi.org/10.1175/JAM2539.1>, 2007a.
- Pleim, J. E.: A combined local and nonlocal closure model for the atmospheric boundary layer Part II: Application and evaluation in a mesoscale meteorological model, *J. Appl. Meteorol. Clim.*, 46(9), 1396–1409, <https://doi.org/10.1175/JAM2534.1>, 2007b.
- Xiu, A., & Pleim, J. E.: Development of a land surface model Part I: Application in a mesoscale meteorological model, *J. Appl. Meteorol. Clim.*, 40(2), 192–209, [https://doi.org/10.1175/1520-0450\(2001\)040<0192:DOALSM>2.0.CO;2](https://doi.org/10.1175/1520-0450(2001)040<0192:DOALSM>2.0.CO;2), 2001.
